# Supplementary material for: Symmetry-breaking charge separation in weakly coupled anthracene dimers
Source: Royal Society of Chemistry journal article supplement (doi:10.1039/d3tc03007e), 2023-01-01
Supplement: d3tc03007e1.pdf [file d3tc03007e1.pdf]

*Electronic Supplementary Information:*

**Symmetry-breaking charge separation in weakly coupled anthracene dimers**

Liping Lv<sup>†, a</sup>, Heyuan Liu<sup>†, a, \*</sup>, Tianyu Li<sup>a</sup>, Boce Cui<sup>a</sup>, Tianying Wang<sup>a</sup>, Xiaojuan Song<sup>a</sup>,  
Wenmiao Chen<sup>b</sup>, Yanli Chen<sup>a</sup>, and Xiyou Li<sup>a, \*</sup>

**Content**

|                                                                                                                          |    |
|--------------------------------------------------------------------------------------------------------------------------|----|
| 1. <sup>1</sup> H NMR spectra and MALDI-TOF spectra of Ph-BPEA and <i>o-/m-/p-</i> dimer 2                               |    |
| 2. CV and DPV of Ph-BPEA and <i>o-/m-/p-</i> dimer .....                                                                 | 6  |
| 3. Solvent-polarity-dependent absorption experiment of <i>o-/m-/p-</i> dimer .....                                       | 7  |
| 4. The fluorescence spectra and dynamics of monomer Ph-BPEA .....                                                        | 8  |
| 5. <i>fs</i> -TA spectra of <i>o-/m-/p-</i> dimer in THF excited at 420 nm .....                                         | 9  |
| 6. Electron transfer experiment .....                                                                                    | 11 |
| 7. <i>fs</i> -TA spectra of <i>o-/m-/p-</i> dimer in polystyrene (PS) film and polymethyl methacrylate (PMMA) film ..... | 12 |
| 8. Charge separation and charge recombination rates .....                                                                | 13 |
| 9. Theoretical calculation .....                                                                                         | 19 |

1.  $^1\text{H}$  NMR spectra and MALDI-TOF spectra of Ph-BPEA and *o*-/*m*-/*p*- dimer

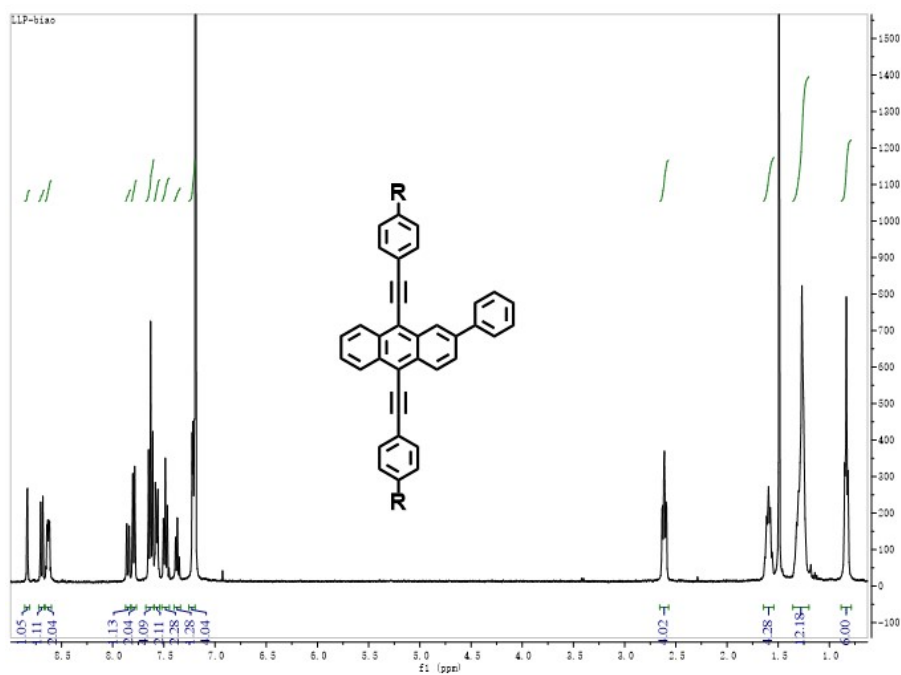

Fig. S1 The  $^1\text{H}$  NMR spectrum of Ph-BPEA.

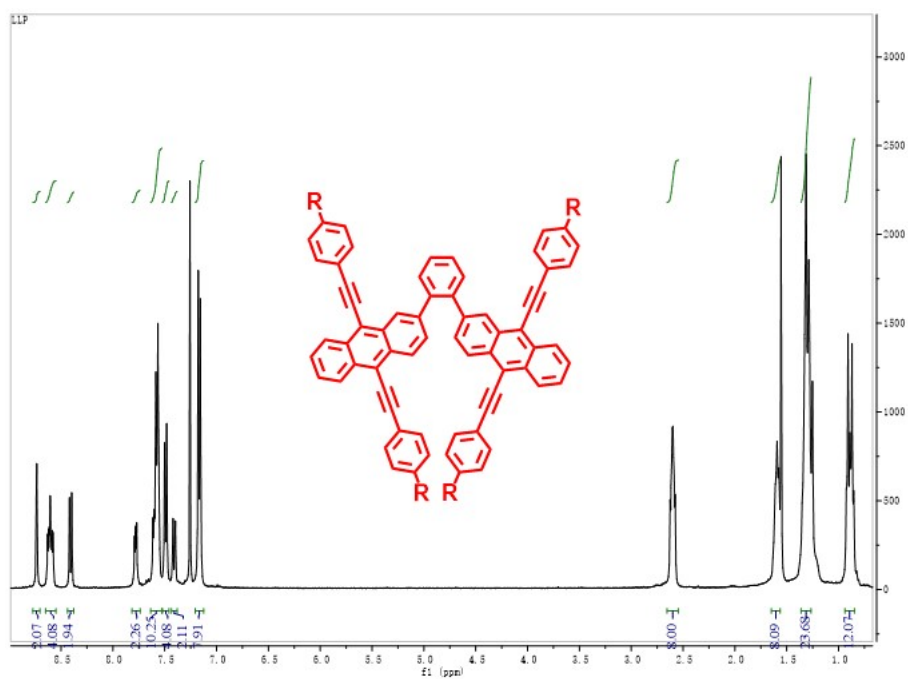

Fig. S2 The  $^1\text{H}$  NMR spectrum of *o*-dimer.

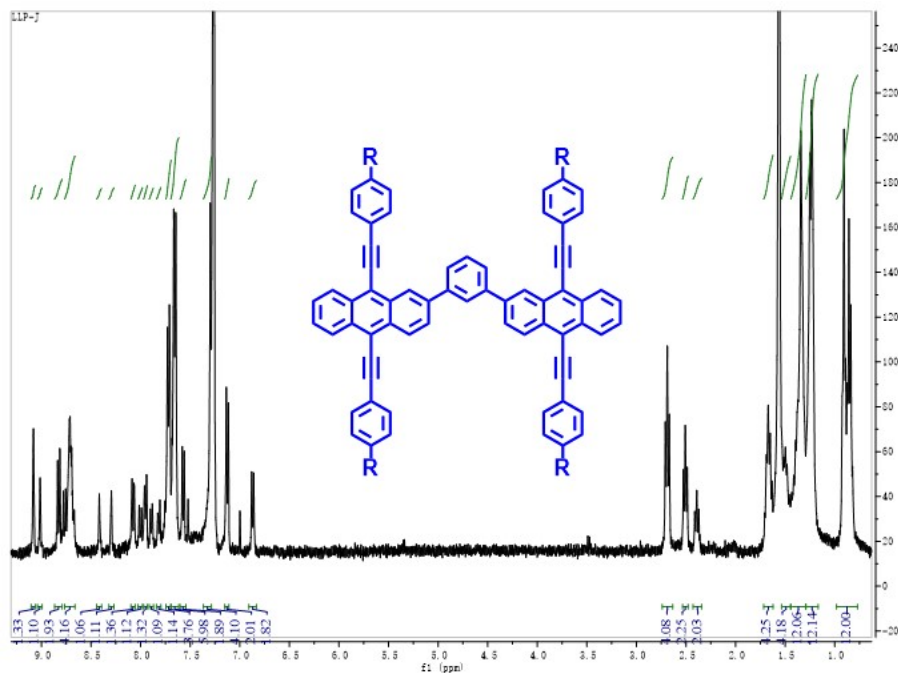

Fig. S3 The  $^1\text{H}$  NMR spectrum of *m*-dimer.

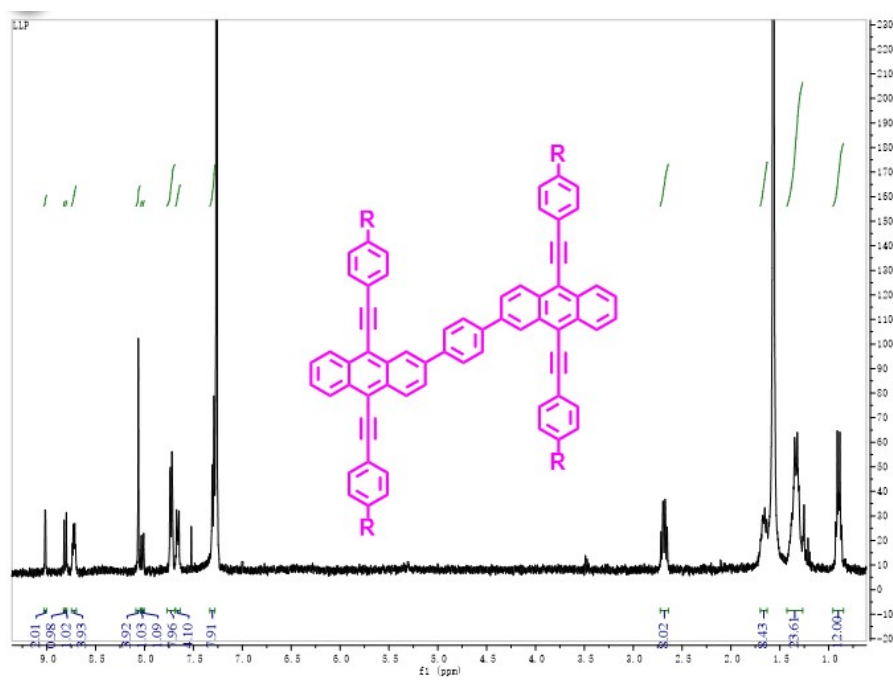

Fig. S4 The  $^1\text{H}$  NMR spectrum of *p*-dimer.

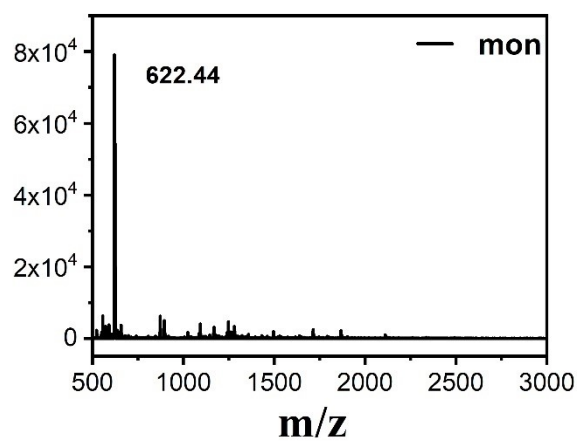

**Fig. S5** The MALDI-TOF spectrum of Ph-BPEA

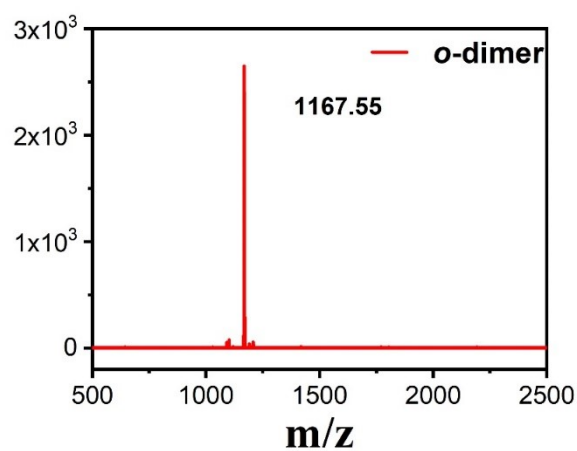

**Fig. S6** The MALDI-TOF spectrum of *o*-dimer.

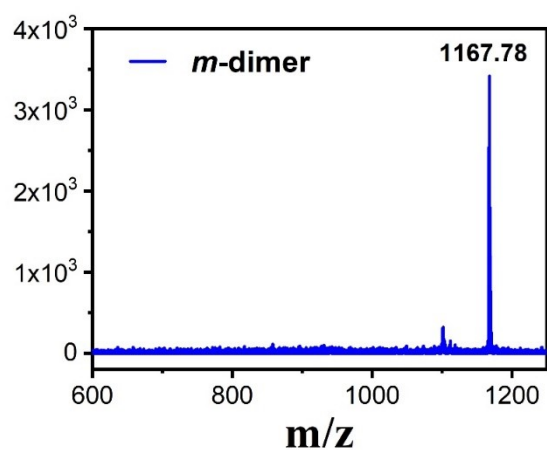

**Fig. S7** The MALDI-TOF spectrum of *m*-dimer.

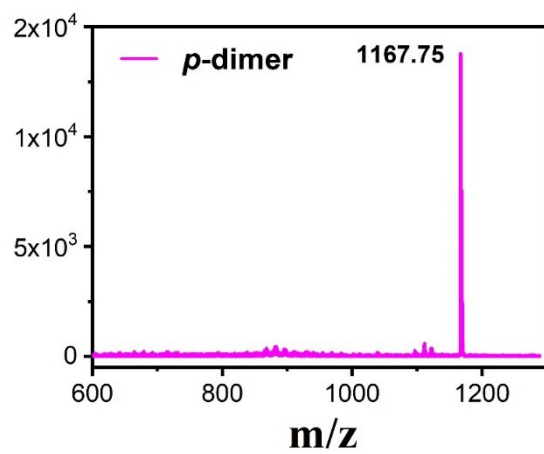

**Fig. S8** The MALDI-TOF spectrum of *p*-dimer.

## 2. CV and DPV of Ph-BPEA and *o*-/*m*-/*p*- dimer

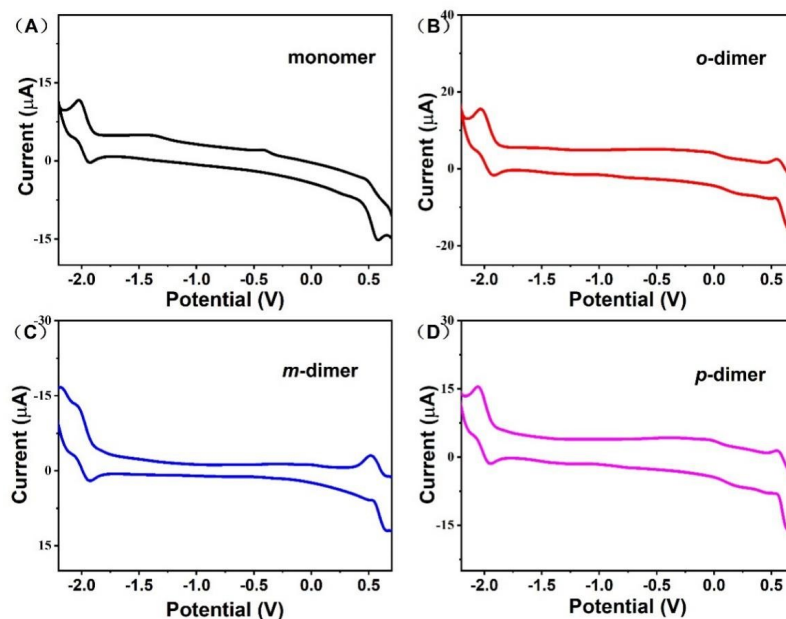

**Fig. S9** CV plots of *o*-dimer, *m*-dimer and *p*-dimer as well as their monomer in dry dichloromethane containing 0.1 M (nBu)<sub>4</sub>NPF<sub>6</sub> as the supporting electrolyte and ferrocene as an internal reference.

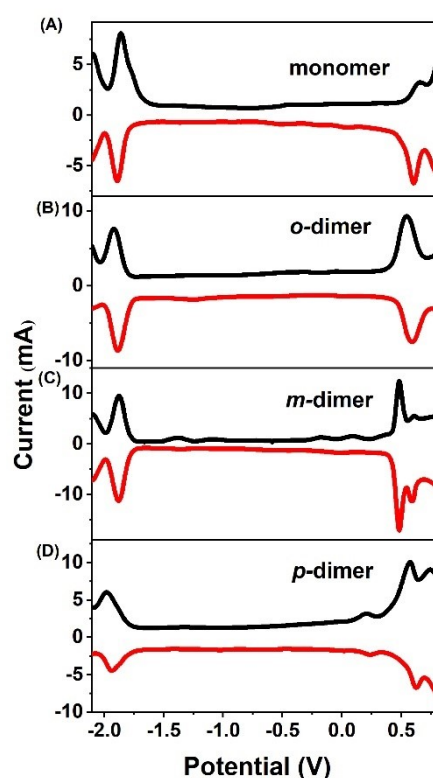

**Fig. S10** DPV plots of *o*-dimer, *m*-dimer and *p*-dimer as well as their monomer in dry dichloromethane containing 0.1 M (nBu)<sub>4</sub>NPF<sub>6</sub> as the supporting electrolyte and ferrocene as an internal reference.

### 3. Solvent-polarity-dependent absorption experiment of *o*-/*m*-/*p*- dimer

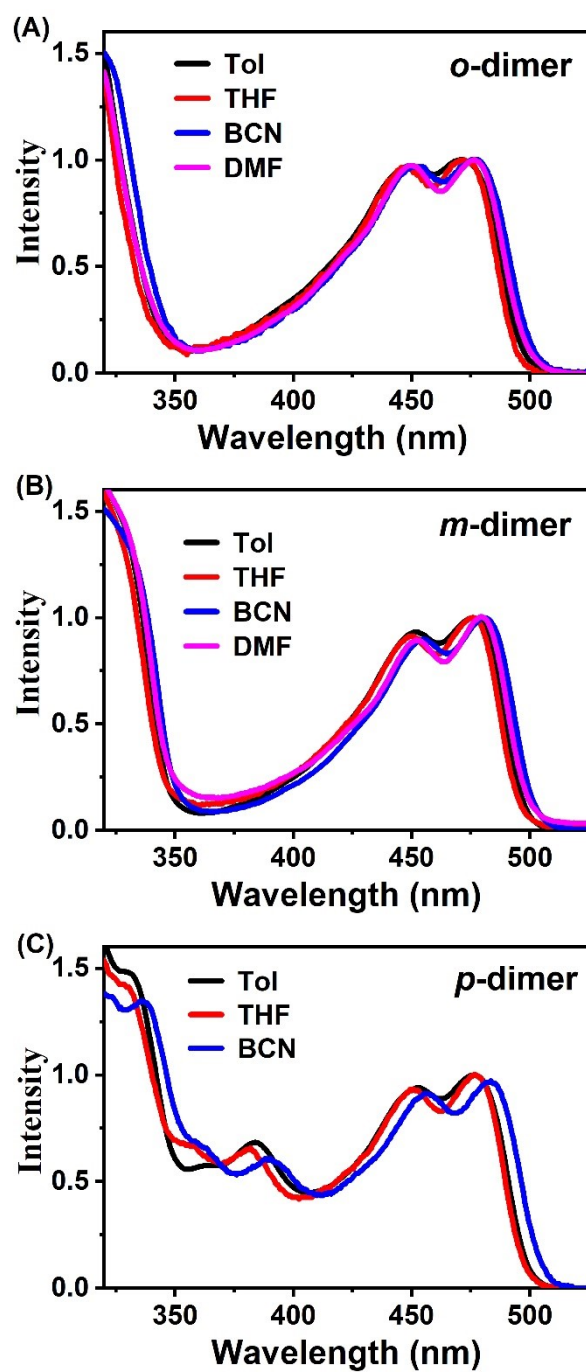

**Fig. S11** Absorption spectra of *o*-dimer (A), *m*-dimer (B) and *p*-dimer (C) in different polarity solvents.

#### 4. The fluorescence spectra and dynamics of monomer Ph-BPEA

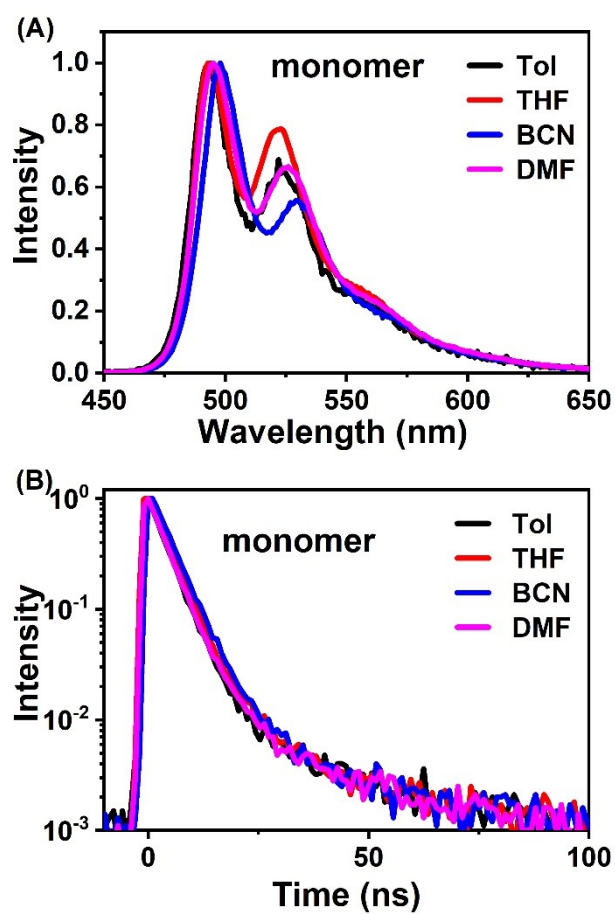

**Fig. S12** The fluorescence spectra (A) and dynamics (B) of monomer Ph-BPEA.



5. *fs*-TA spectra of *o*-/*m*-/*p*-dimer in THF excited at 420 nm

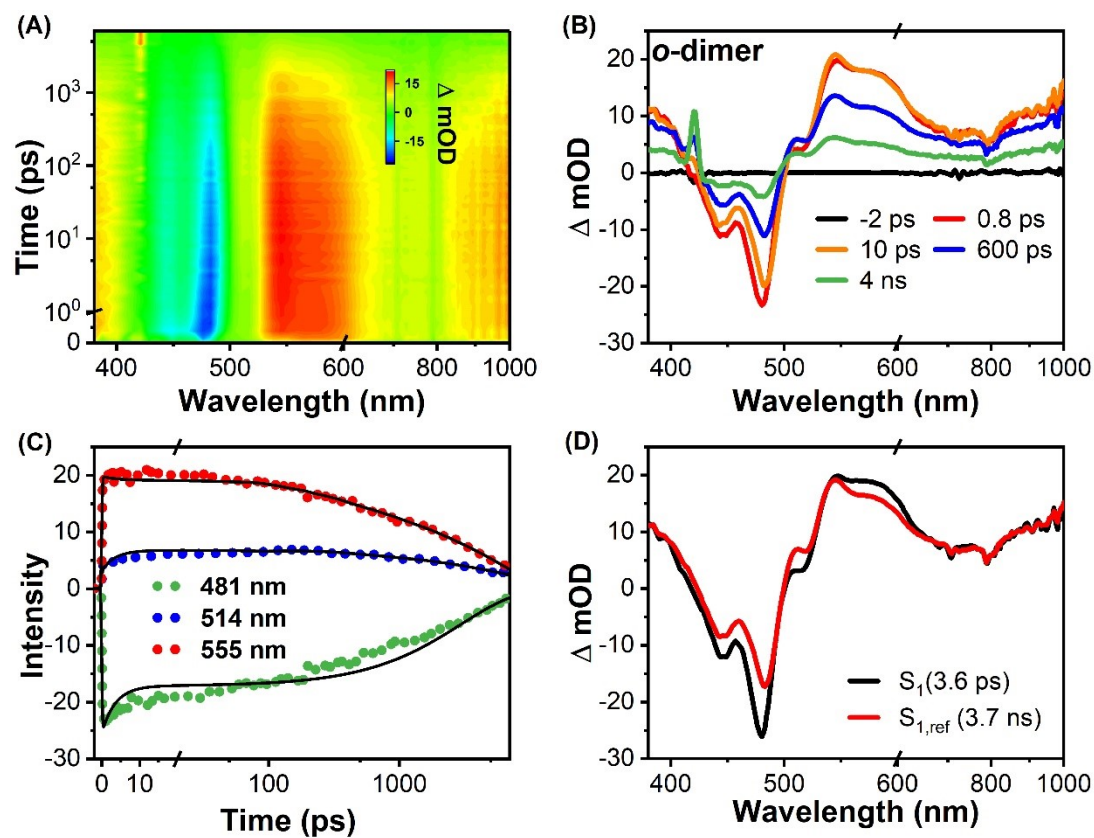

**Fig. S13** (A, B) *fs*-TA spectra of *o*-dimer in THF excited at 420 nm. (C) Single-wavelength dynamics probed at different wavelengths (dotted line). The black solid line shows the fitting line from global analysis. (D) Species-associated spectra obtained from global analysis.

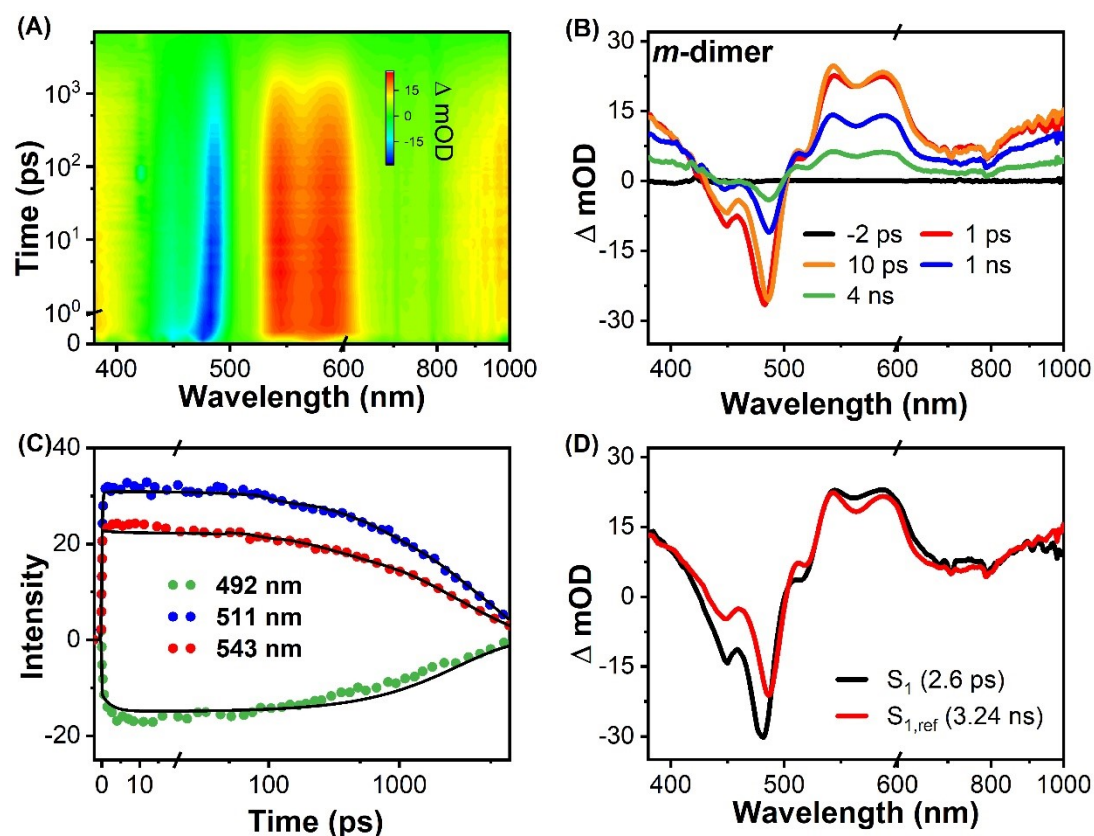

**Fig. S14** (A, B) *fs*-TA spectra of *m*-dimer in THF excited at 420 nm. (C) Single-wavelength dynamics probed at different wavelengths (dotted line). The black solid line shows the fitting line from global analysis. (D) Species-associated spectra obtained from global analysis.

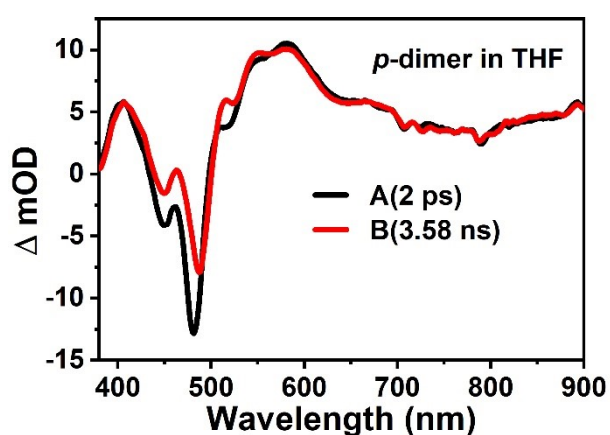

**Fig. S15** Species-associated spectra of *p*-dimer in THF obtained from global analysis.

## 6. Electron transfer experiment

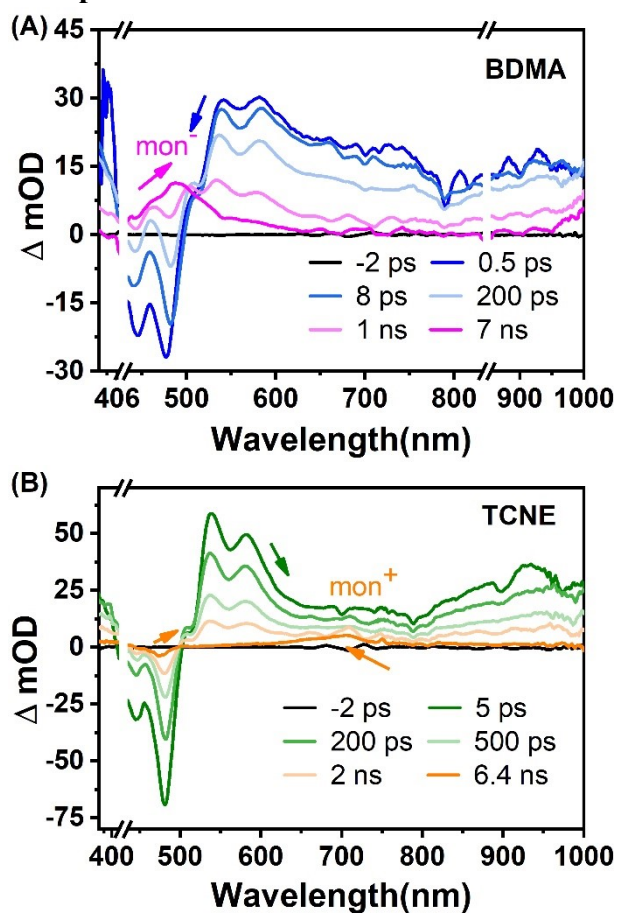

**Fig. S16** *fs*-TA Spectra of monomer in the presence of N, N-dimethylphenylamine (A) or tetrachyanethene (B) excited at 420 nm.

The TA spectra of monomer Ph-BPEA in the presence of N, N-dimethylphenylamine or tetrachyanethene clearly reveal that both radical anionic and cationic features of BPEA.

7. *fs*-TA spectra of *o*-/*m*-/*p*- dimer in polystyrene (PS) film and polymethyl methacrylate (PMMA) film

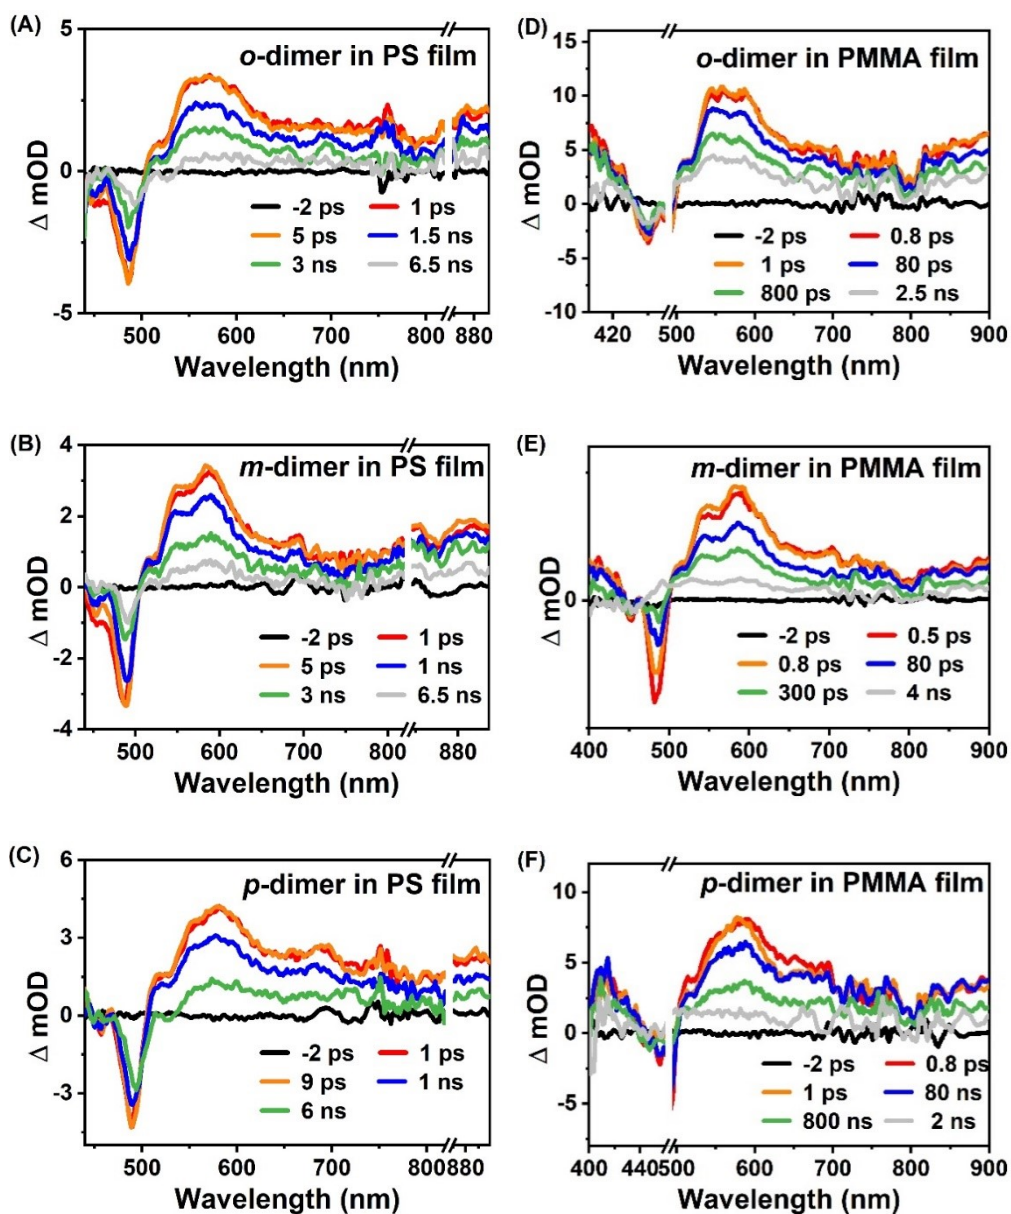

**Fig. S17** *fs*-TA experiment of *o*-dimer (A, D), *m*-dimer (B, E) and *p*-dimer (C, F) in PS and PMMA film excited at 420 nm.

## 8. Charge separation and charge recombination rates

**Table S1:** Comparison of charge separation and charge recombination rates of *o*-/*m*-/*p*-dimer.

|                 | Solvent | 1/ $K_{CS}$ | 1/ $K_{CR}$ | $K_{CR}/K_{CS}$ |
|-----------------|---------|-------------|-------------|-----------------|
| <i>o</i> -dimer | BCN     | 39 ps       | 10.3 ns     | 26              |
|                 | DMF     | 8 ps        | 20 ns       | 2500            |
| <i>m</i> -dimer | BCN     | 165 ps      | 7.1 ns      | 43              |
|                 | DMF     | 77 ps       | 12.8 ns     | 166             |
| <i>p</i> -dimer | BCN     | 55 ps       | 8.1 ns      | 147             |

**Table S2:** Comparison of charge separation and charge recombination rates in different derivatives in the literature.

| Contributed by                            | Molecule                                                                                                                                                           | Solvent | 1/ $K_C$ <sub>S</sub> | 1/ $K_C$ <sub>R</sub> | $K_{CR}/K_{CS}$ |
|-------------------------------------------|--------------------------------------------------------------------------------------------------------------------------------------------------------------------|---------|-----------------------|-----------------------|-----------------|
| Heyuan Liu,<br>Xiyou Li and<br>co-workers | Orthogonal anthracene<br>dimer<br>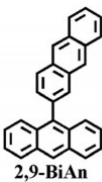<br>2,9-BiAn<br>Mater. Horiz., 2019,6,<br>990 | DMF     | 3.2<br>ps             | 11.6<br>9 ns          | 3653            |
| Mark E.<br>Thompson and<br>co-workers     | Boron dipyridylmethene<br>dimer                                                                                                                                    | ACN     | 1.4<br>ps             | 4.2<br>ns             | 3000            |

|                                       |                                                                                                                                                                                                                                                                                 |     |              |            |      |
|---------------------------------------|---------------------------------------------------------------------------------------------------------------------------------------------------------------------------------------------------------------------------------------------------------------------------------|-----|--------------|------------|------|
|                                       | 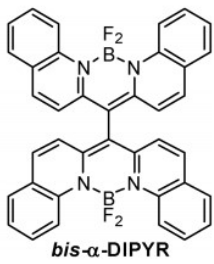 <p style="text-align: center;"><b>bis-<math>\alpha</math>-DIPYR</b></p> <p style="text-align: center;">ACS Appl. Energy Mater. 2018, 1, 1083–1095</p>                                         |     |              |            |      |
| Ebin Sebastian and Mahesh Hariharan   | <p style="text-align: center;">Spiro-conjugated perylene diimide dimer</p>  <p style="text-align: center;">J. Am. Chem. Soc. 2021, 143, 13769–13781</p>                                        | ACN | 0.62<br>7 ps | 1.66<br>ns | 2647 |
| Mark E. Thompson and co-workers       | <p style="text-align: center;">two dipyrin ligands coordinated in a tetrahedral geometry at the Zn<sup>2+</sup> ion</p>  <p style="text-align: center;">Faraday Discuss., 2019, 216, 379</p> | ACN | 1.1<br>ps    | 0.9<br>ns  | 818  |
| Michael R. Wasielewski and co-workers | <p style="text-align: center;">Spiro-Fused Terrylenediimide Dimer</p>                                                                                                                                                                                                           | THF | 5.9<br>ps    | 2.05<br>ns | 339  |

|                                       |                                                                                                                                                                                                                                                                                                                                                                                                                                                                                                                                                                     |                                 |          |            |         |
|---------------------------------------|---------------------------------------------------------------------------------------------------------------------------------------------------------------------------------------------------------------------------------------------------------------------------------------------------------------------------------------------------------------------------------------------------------------------------------------------------------------------------------------------------------------------------------------------------------------------|---------------------------------|----------|------------|---------|
|                                       | 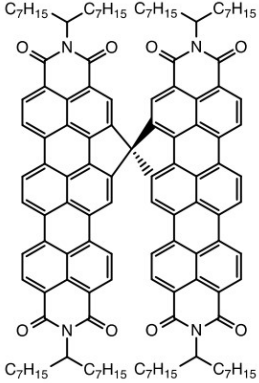 <p>J. Phys. Chem. B 2021,<br/>125, 6945–6954</p>                                                                                                                                                                                                                                                                                                                                                                                                                                  |                                 |          |            |         |
| Mark E. Thompson and co-workers       | <p>Zinc Dipyrins</p>  <p><i>zDIP1</i>: R<sub>1,4</sub> = H; <i>zDIP3</i>: R<sub>1,3</sub> = -CH<sub>3</sub>, R<sub>2</sub> = H;<br/> <i>zDIP2</i>: R<sub>1</sub> = -CH<sub>3</sub>, R<sub>2,3</sub> = H; <i>zDIP4</i>: R<sub>1,3</sub> = -CH<sub>3</sub>, R<sub>2</sub> = H;<br/> <i>zDIP2'</i>: R<sub>1</sub> = -CH<sub>3</sub>, R<sub>2,3</sub> = H; <i>zDIP3'</i>: R<sub>1,3</sub> = -CH<sub>3</sub>, R<sub>2</sub> = H</p> <p>J. Phys. Chem. C 2014,<br/>118, 21834–21845</p> | polar solvents                  | 1-5.5 ps | 0.9-3.3 ns | 163-333 |
| Michael R. Wasielewski and co-workers | <p>Perylene diimide Cyclophanes</p>  <p>J. Phys. Chem. C 2020,<br/>124, 10408–10419</p>                                                                                                                                                                                                                                                                                                                                                                                          | CH <sub>2</sub> Cl <sub>2</sub> | 23.5 ps  | 7.36 ns    | 313     |
| Stephen R. Meech and co-workers       | <p>Subphthalocyanine Dimer</p>                                                                                                                                                                                                                                                                                                                                                                                                                                                                                                                                      | ACN                             | 1.2 ps   | 307 ps     | 255     |

|                           |                                                                                                                                                                                                                |     |          |            |         |
|---------------------------|----------------------------------------------------------------------------------------------------------------------------------------------------------------------------------------------------------------|-----|----------|------------|---------|
|                           | 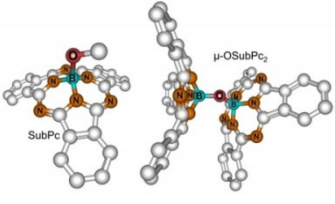 <p>Angew. Chem. Int. Ed.<br/>2021, 60, 10568 – 10572</p>                                                                     |     |          |            |         |
| Andong Xia and co-workers | <p>Isomeric N-Annulated Perylene Diimide Dimers</p>  <p><i>p</i>-BDNP</p> <p>J. Am. Chem. Soc. 2019,<br/>141, 12789–12796</p> | THF | 12.4 ps  | 1.94 ns    | 156     |
| Dongho Kim and co-workers | <p>1,6,7,12-tetra(4-tert-butylphenoxy)perylene dimer</p>  <p>J. Phys. Chem. Lett.<br/>2019, 10, 8, 1919-1927</p>            | BCN | 23-25 ps | 2.5-2.8 ns | 121-100 |
| Andong Xia and co-workers | <p>Multibranch Perylene Diimide Molecules</p>                                                                               | DMF | 44.7 ps  | 4.8 ns     | 107     |



|                                       |                                                                                                                                                                                                     |                                 |        |         |       |
|---------------------------------------|-----------------------------------------------------------------------------------------------------------------------------------------------------------------------------------------------------|---------------------------------|--------|---------|-------|
|                                       | J. Phys. Chem. Lett.<br>2020, 11, 10329–10339                                                                                                                                                       |                                 |        |         |       |
| Michael R. Wasielewski and co-workers | <p>Perylenediimide<br/>Molecular Triangles</p> 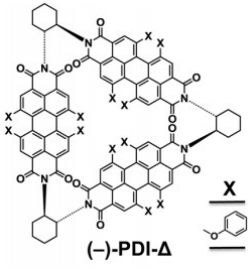 <p>(-)-PDI-Δ</p> <p>J. Am. Chem. Soc.,<br/>2015, 137,13236</p>     | CH <sub>2</sub> Cl <sub>2</sub> | 12 ps  | 1.12 ns | 93    |
| Dongho Kim and co-workers             | <p>push–pull porphyrin<br/>arrays</p>  <p>Phys. Chem. Chem. Phys., 2017, 19, 13970</p>                            | BCN                             | 39 ps  | 760 ps  | 19.48 |
| Eric Vauthey and co-workers           | <p>1,3-bis(3-<br/>perylene)propane<br/>bichromophoric dyad</p>  <p>Angew. Chem. Int. Ed. 2011, 50, 7596–7598</p> | ACN                             | 12 ps  | 130 ps  | 10.8  |
| Eric Vauthey and co-workers           | <p>perylene<br/>bichromophores</p>                                                                                                                                                                  | 18C4<br>ACN                     | 4.3 ns | 41.1 ns | 9.5   |

|                                              |                                                                                                                                                                                   |                     |               |               |            |
|----------------------------------------------|-----------------------------------------------------------------------------------------------------------------------------------------------------------------------------------|---------------------|---------------|---------------|------------|
|                                              | 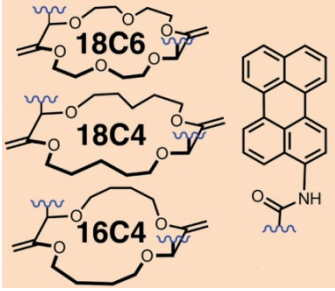 <p>Chem. Sci., 2019, 10, 10629</p>                                                              | <p>18C6<br/>ACN</p> | <p>25 ns</p>  | <p>40 ns</p>  | <p>1.6</p> |
| <p>Michael R. Wasielewski and co-workers</p> | <p>Terrylenediimide<br/>Guanine-Quadruplex</p>  <p>J. Am. Chem. Soc. 2019, 141, 17512–17516</p> | <p>THF</p>          | <p>192 ps</p> | <p>1.6 ns</p> | <p>8.3</p> |

## 9. Theoretical calculation

The Gibbs free energy are calculated based on the Rehm–Weller equation<sup>1-3</sup>.

$$\Delta G_{CS} = e(E_{OX} - E_{RED}) - E^* + \Delta G_S \quad (1)$$

$$\Delta G_S = -\frac{e^2}{4\pi\epsilon_0\epsilon_S R_{CC}} - \frac{e^2}{8\pi\epsilon_0} \left( \frac{1}{R_A} + \frac{1}{R_D} \right) \left( \frac{1}{\epsilon_{REF}} - \frac{1}{\epsilon_S} \right) \quad (2)$$

$$\Delta G_{CR} = (-E^* + \Delta G_{CS}) \quad (3)^4$$

Where,  $E_{OX}$  and  $E_{RED}$  are the first oxidation and first reduction potentials of *o/m/p*-dimer in  $\text{CH}_2\text{Cl}_2$  calculated by cyclic voltammetry (CV) and differential pulse voltammetry (DPV) with the ferrocene/ferrocenium ( $\text{Fc}/\text{Fc}^+$ ) couples as reference. (Fig. S9, S10).  $\epsilon_S$  is the dielectric constant of the actual solvent (Tol, THF, BCN and DMF, with  $\epsilon = 2.38, 7.58, 24.50$  and  $36.70$ , respectively).  $E^*$  is the energy of the singlet excited state.  $\epsilon_{REF}$  is the dielectric constant of the reference solvent used in electrochemistry (DCM: 9.3).  $R_{CC}$  is the donor-acceptor distance.  $R_A$  and  $R_D$  are hard-sphere radii, approximately  $\frac{R_{CC}}{2}$ . The calculated results are shown in Table 3 of main text.

## Reference

1. E. Sebastian and M. Hariharan, *ACS Energy Letter.*, 2022, **7**, 696-711.
2. R. A. Marcus, *J. Chem. Phys.*, 2020, **153**, 210401.
3. R. A. Marcus, *J. Chem. Phys.*, 1965, **43**, 679-701.
4. E. Sebastian and M. Hariharan, *J. Am. Chem. Soc.*, 2021, **143**, 13769-13781.
